# Supplementary material for: Reconstitution of surface lipoprotein translocation through the Slam translocon
Source: eLife. 2022 Apr 27;11:e72822. doi: 10.7554/eLife.72822 (PMC9090332; doi:10.7554/eLife.72822)
Supplement: Figure 2—source data 1. [file elife-72822-fig2-data1.csv]

	Spheroplast-dependent translocation	Spheroplast-dependent translocation	Spheroplast-dependent translocation	Spheroplast-dependent translocation	Spheroplast-independent translocation	Spheroplast-independent translocation	Spheroplast-independent translocation	Spheroplast-independent translocation
Empty	5.8	6.2	7.2*	4.7		11	3.5	3.5
Bam	6.3	6.8	6.8*	9.8		8.7	1.9	5.8
Slam1	27	34.1	52.4*	39.3		40	37.8	43.6
Bam+Slam1	33.2	34.3	48.9*	35.3		32.7	28	37.2
* excluded data
