# Supplementary material for: Reconstitution of surface lipoprotein translocation through the Slam translocon
Source: eLife. 2022 Apr 27;11:e72822. doi: 10.7554/eLife.72822 (PMC9090332; doi:10.7554/eLife.72822)
Supplement: Figure 2—source data 2. [file elife-72822-fig2-data2.csv]

Time (min)	BamABCDE	BamABCDE	BamABCDE	BamABCDE	BamABCDE	Slam1	Slam1	Slam1	Slam1	Slam1
0	0	0	0	0		0	0	0	0
5	3.23	11.2	7.4	5.21		12.1	3.1*	15.1	2.9*
10	2.82	12.4	6.18	5.8		32.5	5*	21.42	19.2
15	1.57	10.8	6.59	6.2		19.68*	7.8*	34.15	30.04
20	1.27	8.85	5.12	4.61		43.93	15.27*	39.8	42.01
30	1.7	6.22	4.69	9.27		46.32	44.5	41.24	45.93
40	0.8	7.62				29.69	34.22
50	1.45	9.6				23.7	34.1
60	1.64	8.8				22.72	34.2
* excluded value
