# Supplementary material for: Reconstitution of surface lipoprotein translocation through the Slam translocon
Source: eLife. 2022 Apr 27;11:e72822. doi: 10.7554/eLife.72822 (PMC9090332; doi:10.7554/eLife.72822)
Supplement: Figure 4—source data 1. [file elife-72822-fig4-data1.csv]

WT + empty + TbpB	WT + slam1 + TbpB	Dskp + slam1 + TbpB	DdegP + slam1 + TbpB
0.10167	1	0.452335	0.873276
0.02271	1	0.458969	0.875174
0.127185*	1*	0.290225*	0.538875*
0.247021	1	0.735686	0.960614
0.227523	1	0.600098	0.875028
* excluded data
