# Supplementary material for: Reconstitution of surface lipoprotein translocation through the Slam translocon
Source: eLife. 2022 Apr 27;11:e72822. doi: 10.7554/eLife.72822 (PMC9090332; doi:10.7554/eLife.72822)
Supplement: Figure 4—source data 2. [file elife-72822-fig4-data2.csv]

Empty + SurA	Empty + Skp	Slam1 + SurA	Slam1 + Skp
0	3.44	1	6.125
0	2.25	1	5.01
0	3.22	1	4.45
