# Supplementary material for: Reconstitution of surface lipoprotein translocation through the Slam translocon
Source: eLife. 2022 Apr 27;11:e72822. doi: 10.7554/eLife.72822 (PMC9090332; doi:10.7554/eLife.72822)
Supplement: Figure 4—source data 3. [file elife-72822-fig4-data3.csv]

	Empty + SurA	Empty + Skp	Slam1 + SurA	Slam1 + Skp
	0.4	7.7	8.4*	28.7
	0.2	7	3	30.4
	0.5	13.5	3.2	27.2
* excluded value
