# Supplementary material for: Reconstitution of surface lipoprotein translocation through the Slam translocon
Source: eLife. 2022 Apr 27;11:e72822. doi: 10.7554/eLife.72822 (PMC9090332; doi:10.7554/eLife.72822)
Supplement: Figure 5—figure supplement 3—source data 1. [file elife-72822-fig5-figsupp3-data1.csv]

Time (h)	BHI	BHI	BHI	BHI	Wildtype	Wildtype	Wildtype	Wildtype	?slam1	?slam1	?slam1	?slam1	?tbpB	?tbpB	?tbpB	?tbpB	?skp	?skp	?skp	?skp
0	0.157	0.153			0.162	0.157			0.161	0.16	0.169	0.168	0.172	0.159	0.155	0.169	0.163	0.159	0.158	0.165
0.5	0.157	0.149			0.16	0.157			0.165	0.163	0.169	0.17	0.172	0.16	0.157	0.17	0.162	0.161	0.158	0.167
1	0.157	0.152			0.165	0.158			0.165	0.165	0.172	0.173	0.176	0.164	0.158	0.173	0.164	0.163	0.163	0.167
1.5	0.157	0.152			0.171	0.16			0.167	0.167	0.172	0.171	0.178	0.163	0.16	0.176	0.166	0.163	0.163	0.168
2	0.157	0.151			0.177	0.165			0.165	0.165	0.171	0.174	0.185	0.172	0.165	0.181	0.167	0.165	0.163	0.171
2.5	0.157	0.151			0.189	0.176			0.165	0.164	0.171	0.174	0.193	0.181	0.176	0.192	0.168	0.164	0.166	0.175
3	0.16	0.153			0.203	0.19			0.166	0.167	0.172	0.176	0.21	0.195	0.195	0.213	0.169	0.169	0.172	0.181
3.5	0.157	0.152			0.22	0.209			0.165	0.167	0.174	0.177	0.226	0.212	0.215	0.238	0.17	0.169	0.176	0.189
4	0.157	0.151			0.251	0.237			0.165	0.166	0.174	0.176	0.252	0.234	0.243	0.269	0.171	0.172	0.185	0.201
4.5	0.159	0.153			0.286	0.274			0.167	0.167	0.179	0.183	0.285	0.267	0.283	0.313	0.178	0.178	0.198	0.216
5	0.156	0.151			0.33	0.315			0.168	0.169	0.183	0.19	0.319	0.298	0.327	0.357	0.187	0.187	0.212	0.23
5.5	0.157	0.155			0.375	0.36			0.175	0.174	0.192	0.202	0.356	0.334	0.374	0.402	0.2	0.202	0.235	0.252
6	0.157	0.153			0.417	0.404			0.178	0.179	0.207	0.216	0.391	0.364	0.417	0.441	0.214	0.22	0.257	0.273
6.5	0.159	0.154			0.453	0.442			0.183	0.189	0.224	0.234	0.428	0.398	0.455	0.475	0.239	0.244	0.284	0.298
7	0.157	0.151			0.486	0.477			0.201	0.211	0.249	0.257	0.469	0.437	0.491	0.509	0.274	0.283	0.323	0.334
7.5	0.156	0.15			0.513	0.512			0.22	0.232	0.276	0.284	0.507	0.471	0.519	0.534	0.315	0.321	0.36	0.367
8	0.156	0.153			0.536	0.539			0.254	0.265	0.315	0.32	0.542	0.506	0.548	0.561	0.356	0.362	0.398	0.402
8.5	0.159	0.154			0.552	0.564			0.292	0.308	0.356	0.36	0.57	0.538	0.571	0.584	0.396	0.401	0.435	0.433
9	0.156	0.152			0.569	0.588			0.343	0.357	0.404	0.404	0.6	0.567	0.593	0.605	0.435	0.437	0.465	0.463
9.5	0.159	0.154			0.579	0.607			0.392	0.402	0.447	0.444	0.627	0.594	0.615	0.627	0.469	0.469	0.496	0.491
10	0.159	0.154			0.589	0.622			0.435	0.446	0.482	0.478	0.648	0.615	0.633	0.64	0.498	0.496	0.52	0.513
10.5	0.159	0.153			0.598	0.638			0.479	0.488	0.52	0.516	0.674	0.641	0.649	0.658	0.528	0.527	0.546	0.537
11	0.156	0.152			0.607	0.648			0.52	0.524	0.553	0.544	0.689	0.658	0.666	0.675	0.552	0.551	0.568	0.556
11.5	0.159	0.154			0.619	0.667			0.552	0.559	0.58	0.57	0.701	0.674	0.68	0.687	0.575	0.573	0.589	0.578
12	0.156	0.15			0.63	0.679			0.587	0.592	0.61	0.599	0.717	0.689	0.695	0.702	0.599	0.595	0.611	0.598
12.5	0.156	0.15			0.64	0.689			0.615	0.616	0.633	0.627	0.723	0.7	0.703	0.709	0.618	0.613	0.624	0.61
13	0.157	0.151			0.65	0.707			0.643	0.641	0.657	0.649	0.737	0.711	0.718	0.721	0.637	0.633	0.644	0.627
13.5	0.156	0.152			0.655	0.721			0.661	0.66	0.67	0.665	0.743	0.724	0.725	0.732	0.646	0.644	0.65	0.636
14	0.156	0.15			0.664	0.731			0.682	0.685	0.694	0.684	0.757	0.739	0.745	0.748	0.662	0.656	0.663	0.648
14.5	0.158	0.152			0.681	0.735			0.701	0.7	0.707	0.698	0.77	0.757	0.758	0.761	0.67	0.667	0.674	0.657
15	0.156	0.151			0.685	0.742			0.714	0.711	0.722	0.709	0.787	0.773	0.776	0.781	0.684	0.68	0.686	0.668
15.5	0.157	0.151			0.688	0.752			0.72	0.719	0.725	0.716	0.796	0.783	0.785	0.789	0.692	0.686	0.693	0.673
16	0.156	0.152			0.7	0.758			0.731	0.729	0.737	0.727	0.812	0.799	0.797	0.806	0.7	0.697	0.707	0.682
16.5	0.157	0.152			0.715	0.764			0.743	0.741	0.748	0.738	0.829	0.816	0.813	0.819	0.711	0.711	0.714	0.694
17	0.158	0.152			0.72	0.775			0.751	0.748	0.753	0.742	0.84	0.827	0.821	0.829	0.72	0.721	0.723	0.705
17.5	0.156	0.151			0.729	0.784			0.761	0.76	0.763	0.754	0.86	0.841	0.836	0.843	0.733	0.733	0.735	0.72
18	0.156	0.151			0.731	0.79			0.77	0.768	0.77	0.759	0.867	0.852	0.844	0.849	0.739	0.739	0.739	0.715
18.5	0.161	0.153			0.734	0.795			0.781	0.782	0.78	0.777	0.881	0.864	0.856	0.871	0.751	0.748	0.751	0.738
19	0.158	0.149			0.736	0.8			0.789	0.789	0.787	0.787	0.892	0.877	0.866	0.881	0.757	0.757	0.755	0.744
19.5	0.154	0.151			0.739	0.804			0.799	0.797	0.797	0.797	0.906	0.889	0.88	0.896	0.766	0.764	0.762	0.756
20	0.158	0.151			0.742	0.809			0.81	0.808	0.813	0.812	0.919	0.9	0.89	0.907	0.776	0.773	0.773	0.755
20.5	0.159	0.152			0.746	0.813			0.826	0.82	0.823	0.823	0.931	0.911	0.903	0.918	0.785	0.78	0.782	0.758
21	0.16	0.152			0.75	0.816			0.838	0.828	0.83	0.831	0.943	0.919	0.91	0.929	0.794	0.79	0.793	0.776
21.5	0.158	0.152			0.753	0.819			0.849	0.835	0.839	0.835	0.957	0.933	0.922	0.943	0.801	0.795	0.797	0.787
22	0.159	0.153			0.755	0.822			0.855	0.844	0.845	0.842	0.97	0.948	0.933	0.957	0.81	0.804	0.803	0.791
22.5	0.159	0.153			0.757	0.826			0.865	0.852	0.857	0.852	0.982	0.962	0.948	0.969	0.818	0.81	0.809	0.8
23	0.158	0.152			0.76	0.828			0.871	0.859	0.862	0.858	0.993	0.975	0.959	0.98	0.825	0.816	0.81	0.803
23.5	0.16	0.152			0.762	0.831			0.878	0.865	0.866	0.861	1.011	0.986	0.971	0.991	0.833	0.82	0.811	0.81
