# Supplementary material for: Reconstitution of surface lipoprotein translocation through the Slam translocon
Source: eLife. 2022 Apr 27;11:e72822. doi: 10.7554/eLife.72822 (PMC9090332; doi:10.7554/eLife.72822)
Supplement: Figure 5—source data 1. [file elife-72822-fig5-data1.csv]

	Wildtype	?tbpB	?slam1	?skp	?skp + pGCC4 skp
bio-htf	1*	0.065	0.1*	0.14
	1*	0.062*	0.11*	0.132*
	1*	0.062*	0.114*	0.129*
	1*	0.07*	0.115	0.15*
	1	0.3*		0.435*	0.827
	1	0.122	0.293	0.242	0.913
	1	0.109	0.167	0.23	1.03
?-TbpB	1*	0.137*	0.165*	0.658*
	1*	0.136*	0.175*	0.668*
	1*	0.134*	0.172	0.637*
	1	0.129	0.181	0.662
	1	0.124		0.533	0.99
	1*	0.096*	0.118*	0.418*	0.94
	1	0.164	0.249	0.47	0.99
* excluded data
